# Supplementary material for: Intervention of an Upgraded Ventilation System and Effects of the COVID-19 Lockdown on Air Quality at Birmingham New Street Railway Station
Source: MDPI journal article supplement (doi:10.3390/ijerph19010575), 2022-01-05
Supplement: s1 [file s1]

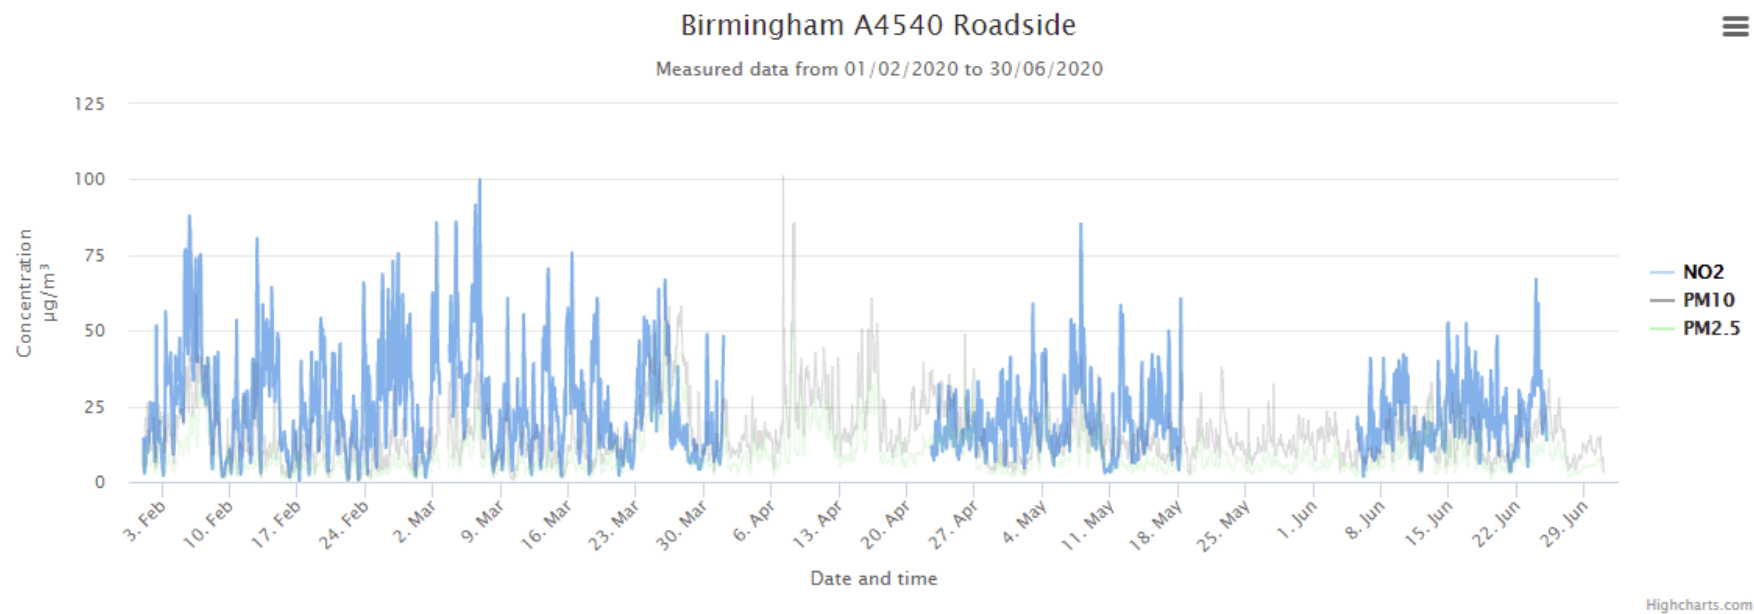

Figure S1. NO<sub>2</sub> ( $\mu\text{g}/\text{m}^3$ ) concentrations measured at Birmingham A4540 Roadside AURN station from 01/02/2020 to 30/06/2020.

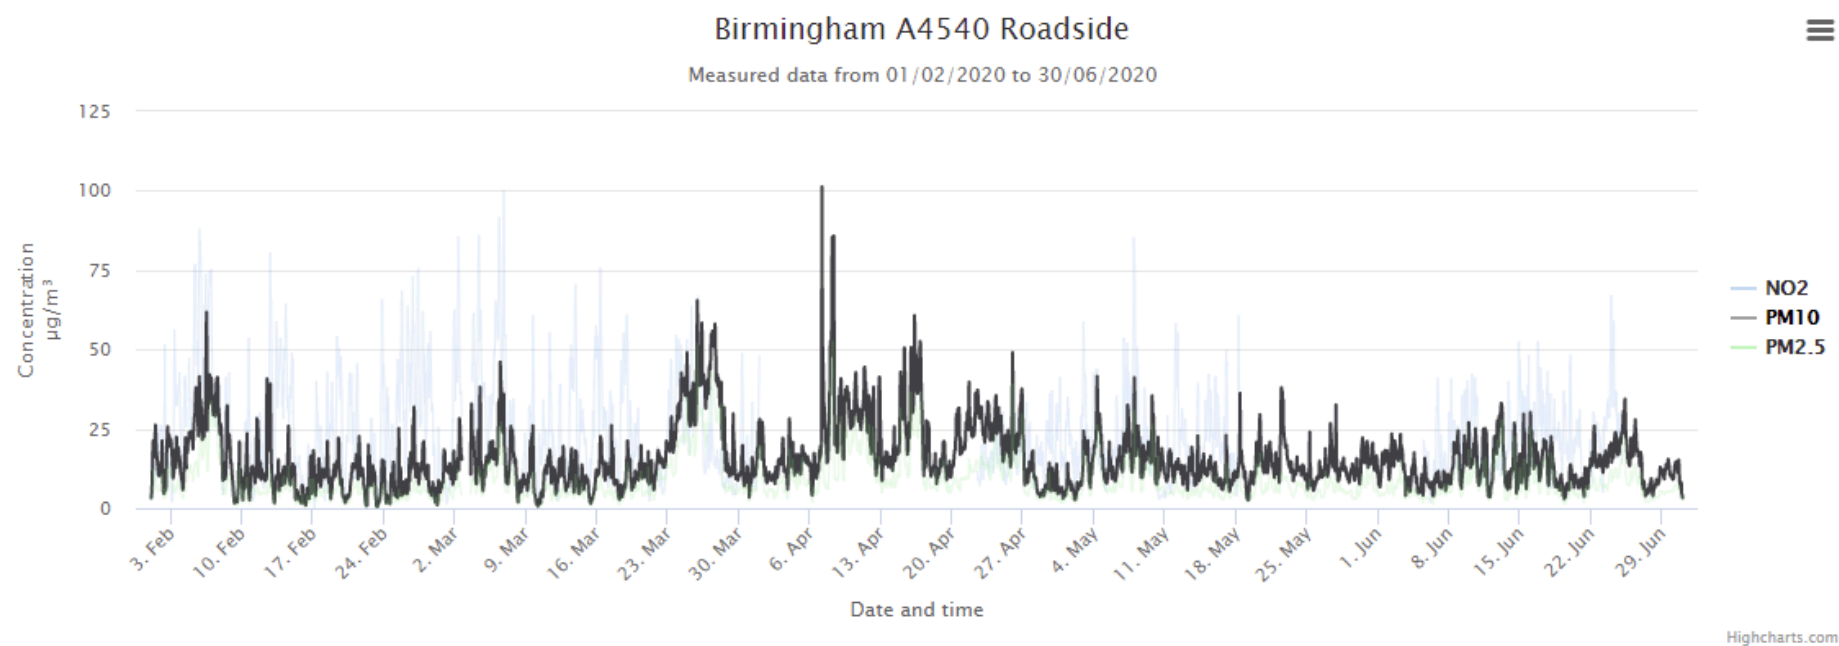

Figure S2. PM<sub>10</sub> ( $\mu\text{g}/\text{m}^3$ ) concentrations measured at Birmingham A4540 Roadside AURN station from 01/02/2020 to 30/06/2020.

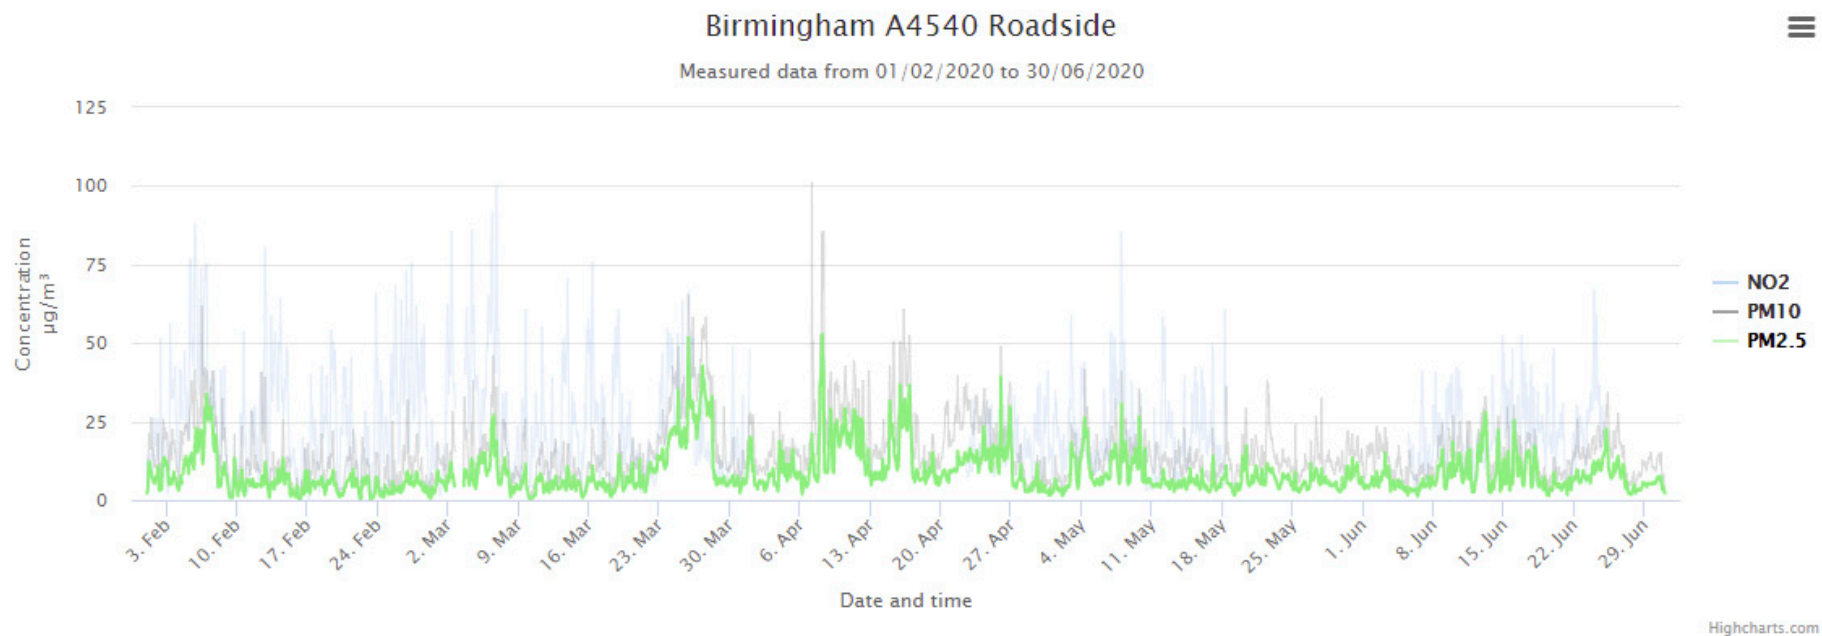

Figure S3. PM<sub>2.5</sub> ( $\mu\text{g}/\text{m}^3$ ) concentrations measured at Birmingham A4540 Roadside AURN station from 01/02/2020 to 30/06/2020.

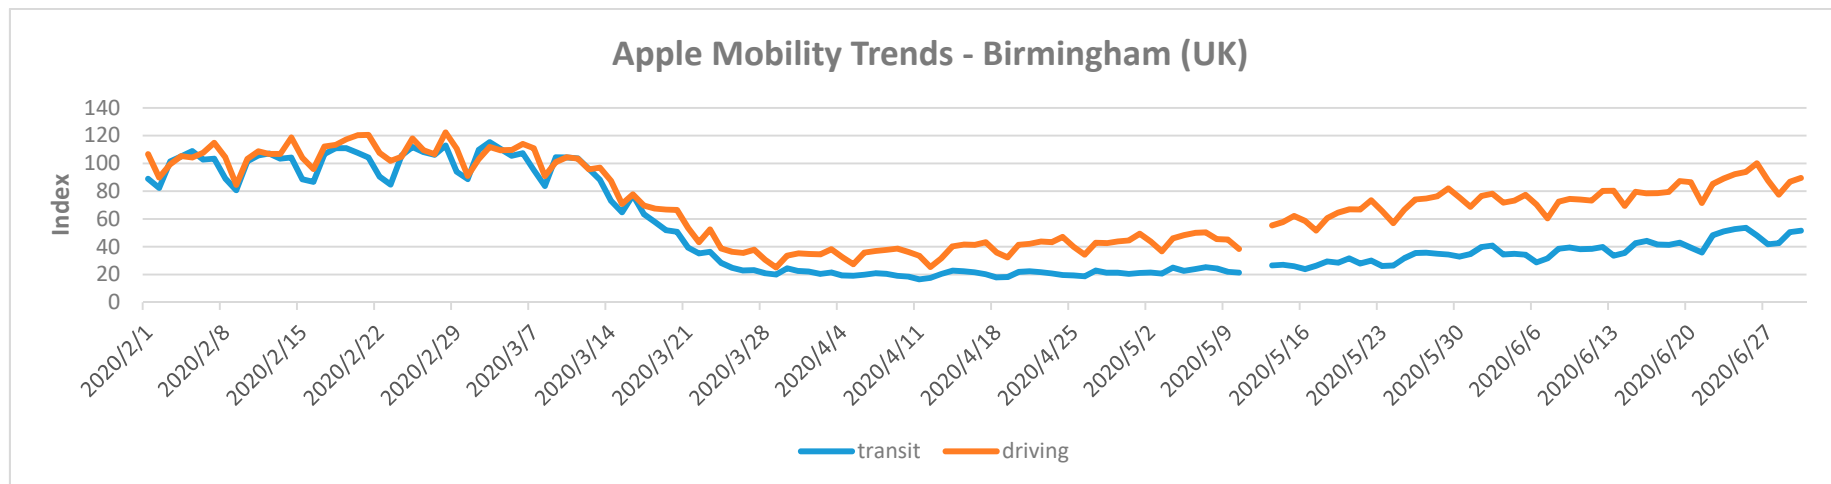

Figure S4. Apple Mobility Trends in Birmingham (UK) from 01/02/2020 to 30/06/2020.

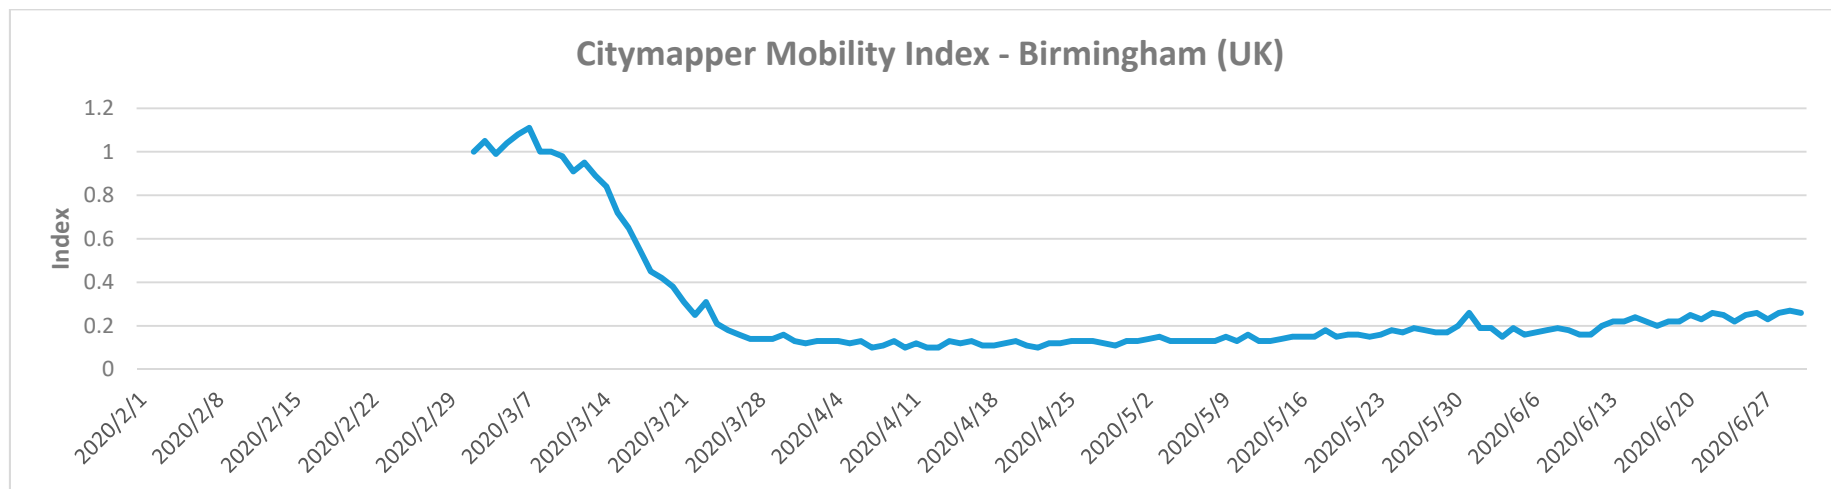

Figure S5. CityMapper Mobility Index in Birmingham (UK) from 01/02/2020 to 30/06/2020.
